# Supplementary material
Source: PubMed Central journal article supplement (PMC3245674)
Supplement: Supp_Data.pdf [file Supp_Data.pdf]

## Supplementary Data

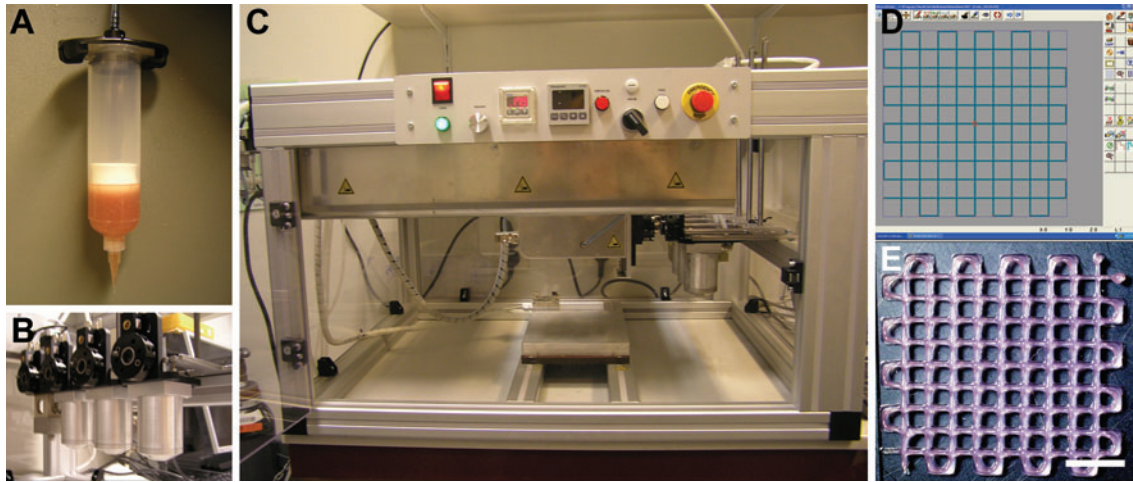

**SUPPLEMENTARY FIG. S1.** The components of the 3D fiber deposition technology. Hydrogel is loaded into the syringe (A), which is placed in one of the cartridges (B) on the BioScaffolder (C). Hydrogel fibers are deposited according to a model for a scaffold that is designed by the computer-aided design/computer-aided manufacturing software (D). Pressure-driven extrusion in a layered fashion yields porous 3D constructs (E). Scale bar: 500  $\mu\text{m}$ . 3D, three-dimensional.
